# Supplementary material for: Correlations among morphological and biochemical traits in high‐cannabidiol hemp ( Cannabis sativa L.)
Source: PubMed Central journal article supplement — Plant Direct. 2023 Jun 19;7(6):e503. doi: 10.1002/pld3.503 (PMC10280002; doi:10.1002/pld3.503), 2023-06-19
Supplement: PLD3-7-e503-s001.pdf [file PLD3-7-e503-s001.pdf]

**Table S1.** List of traits and formulas used in the study.

| Abbreviation               | Description                                                                          | Units              | Formula                                                         |
|----------------------------|--------------------------------------------------------------------------------------|--------------------|-----------------------------------------------------------------|
| <b>Phenology</b>           |                                                                                      |                    |                                                                 |
| FloweringDate              | Date of terminal flowering                                                           |                    |                                                                 |
| HarvestDate                | Date of plant harvest                                                                |                    |                                                                 |
| <b>Architecture</b>        |                                                                                      |                    |                                                                 |
| MCD                        | Maximum canopy diameter                                                              | cm                 |                                                                 |
| MCDH                       | Height of the maximum canopy diameter                                                | cm                 |                                                                 |
| Height                     | Height                                                                               | cm                 |                                                                 |
| MCDtoH                     | Ratio of MCD to H                                                                    |                    | MCD/H                                                           |
| InitialHeight              | Height at transplant                                                                 | cm                 |                                                                 |
| StemDiam                   | Stem diameter                                                                        | mm                 |                                                                 |
| BiconeVol                  | Bicone volume calculated from kite dimensions                                        | cm <sup>3</sup>    | $\pi * MCD^2 * Height / 3$                                      |
| MCDHRatio                  | Ratio of MCDH to H                                                                   |                    | MCDH/H                                                          |
| UpperAng                   | The angle between the MCDH line and the upper hypotenuse                             | degrees            | $180/\pi * \text{atan}((Height-MCDH) / (MCD/2))$                |
| LowerAng                   | The angle between the MCDH line and the lower hypotenuse                             | degrees            | $180/\pi * \text{atan}(MCDH / (MCD/2))$                         |
| Hratio                     | The ratio between the UpperAng and LowerAng                                          |                    | UpperAng/LowerAng                                               |
| UpperAngplusLowerAng       | The sum of the UpperAng and LowerAng                                                 | degrees            | UpperAng + LowerAng                                             |
| lowerHyp                   | The length of the lower hypotenuse                                                   | cm                 | $\sqrt{MCD^2 + MCDH^2}$                                         |
| upperHyp                   | The length of the upper hypotenuse                                                   | cm                 | $\sqrt{MCD^2 + (Height-MCDH)^2}$                                |
| kite_area                  | The area of the kite model                                                           | cm                 | $(Height * MCD) / 2$                                            |
| kite_perim                 | The perimeter of the kite model                                                      | cm                 | $(lowerHyp + upperHyp) * 2$                                     |
| kite_circ                  | The circularity of the kite model                                                    |                    | $4 * \pi * (kite\_area / (kite\_perim^2))$                      |
| kite_bra                   | The branch angle of the kite model (angle between the height line and                | degrees            | $180/\pi * \text{asin}((MCD/2) / lowerHyp)$                     |
| kite_hypr                  | The ratio between the upperHyp and lowerHyp                                          |                    | upperHyp / lowerHyp                                             |
| CanopyArea                 | The two-dimensional area of a field occupied by the plant                            | cm <sup>2</sup>    | MCD <sup>2</sup>                                                |
| <b>Biomass</b>             |                                                                                      |                    |                                                                 |
| WetBiomass                 | The wet biomass of the plant                                                         | kg                 |                                                                 |
| DryBiomass                 | The dry biomass of the plant                                                         | g                  |                                                                 |
| StrippedBiomass            | The stripped inflorescence biomass                                                   | g                  |                                                                 |
| StemBiomass                | The stem biomass                                                                     | g                  |                                                                 |
| S1dry                      | The amount of dry biomass in S1                                                      | g                  |                                                                 |
| S2dry                      | The amount of dry biomass in S2                                                      | g                  |                                                                 |
| S3dry                      | The amount of dry biomass in S3                                                      | g                  |                                                                 |
| S4dry                      | The amount of dry biomass in S4                                                      | g                  |                                                                 |
| S5dry                      | The amount of dry biomass in S5                                                      | g                  |                                                                 |
| mainstemdry                | The amount of dry biomass in the main stem                                           | g                  |                                                                 |
| S1strip                    | The amount of stripped inflorescence biomass in S1                                   | g                  |                                                                 |
| S2strip                    | The amount of stripped inflorescence biomass in S2                                   | g                  |                                                                 |
| S3strip                    | The amount of stripped inflorescence biomass in S3                                   | g                  |                                                                 |
| S4strip                    | The amount of stripped inflorescence biomass in S4                                   | g                  |                                                                 |
| S5strip                    | The amount of stripped inflorescence biomass in S5                                   | g                  |                                                                 |
| logS4striptoS5strip        | The log of S4strip:S5strip                                                           |                    | $\log(S4strip/S5strip)$                                         |
| PropDry                    | The ratio of DryBiomass:WetBiomass                                                   |                    | DryBiomass/WetBiomass                                           |
| PropStripped               | The ratio of StrippedBiomass:DryBiomass                                              |                    | StrippedBiomass/DryBiomass                                      |
| 1PropStripped              | The proportion of S1 dry biomass that was stripped                                   |                    | S1Strip/S1dry                                                   |
| S2PropStripped             | The proportion of S2 dry biomass that was stripped                                   |                    | S2Strip/S2dry                                                   |
| S3PropStripped             | The proportion of S3 dry biomass that was stripped                                   |                    | S3Strip/S3dry                                                   |
| S4PropStripped             | The proportion of S4 dry biomass that was stripped                                   |                    | S4Strip/S4dry                                                   |
| S5PropStripped             | The proportion of S5 dry biomass that was stripped                                   |                    | S5Strip/S5dry                                                   |
| S1toTotal                  | The proportion of total dry biomass from S1                                          |                    | S1dry/DryBiomass                                                |
| S2toTotal                  | The proportion of total dry biomass from S2                                          |                    | S2dry/DryBiomass                                                |
| S3toTotal                  | The proportion of total dry biomass from S3                                          |                    | S3dry/DryBiomass                                                |
| S4toTotal                  | The proportion of total dry biomass from S4                                          |                    | S4dry/DryBiomass                                                |
| S5toTotal                  | The proportion of total dry biomass from S5                                          |                    | S5dry/DryBiomass                                                |
| StrpPerArea                | Stripped biomass produced per unit area                                              | g cm <sup>-2</sup> | StrippedBiomass/CanopyArea                                      |
| WetCanopyDensity           | Wet biomass produced per unit volume                                                 | kg m <sup>-3</sup> | WetBiomass/(BiconeVol/1000000)                                  |
| DryCanopyDensity           | Dry biomass produced per unit volume                                                 | g m <sup>-3</sup>  | StrippedBiomass/(BiconeVol/1000000)                             |
| logDryCanopyDensity        | Log of DryCanopyDensity                                                              |                    | $\log(DryCanopyDensity)$                                        |
| <b>Cannabinoids</b>        |                                                                                      |                    |                                                                 |
| S1TPC                      | The total potential cannabinoid concentration of S1                                  | %                  |                                                                 |
| S2TPC                      | The total potential cannabinoid concentration of S2                                  | %                  |                                                                 |
| S3TPC                      | The total potential cannabinoid concentration of S3                                  | %                  |                                                                 |
| S4TPC                      | The total potential cannabinoid concentration of S4                                  | %                  |                                                                 |
| S5TPC                      | The total potential cannabinoid concentration of S5                                  | %                  |                                                                 |
| CannabConcWeighted         | The weighted concentration of cannabinoids                                           | %                  |                                                                 |
| CannabinoidYield           | The estimated amount of cannabinoids produced by the plant                           | g                  | $S1TPC * S1toTotal + S2TPC * S2toTotal \dots S5TPC * S5toTotal$ |
| CannabinoidsperArea        | The estimated amount of cannabinoids produced per unit area                          | g m <sup>-2</sup>  | CannabinoidYield/(CanopyArea/10000)                             |
| CannabinoidRegressionSlope | The slope of the regression predicting cannabinoid concentration using plant section |                    |                                                                 |
