# Supplementary material for: Correlations among morphological and biochemical traits in high‐cannabidiol hemp ( Cannabis sativa L.)
Source: PubMed Central journal article supplement — Plant Direct. 2023 Jun 19;7(6):e503. doi: 10.1002/pld3.503 (PMC10280002; doi:10.1002/pld3.503), 2023-06-19
Supplement: PLD3-7-e503-s003.pdf [file PLD3-7-e503-s003.pdf]

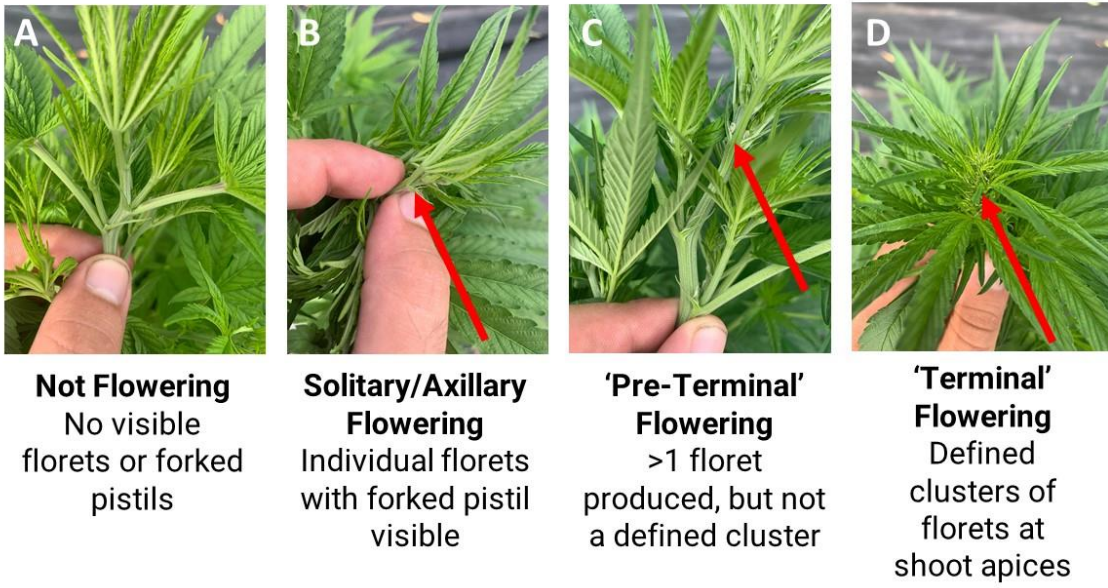

**Supplementary Figure S1.** Flowering stage rating scale for pistillate *C. sativa* following the descriptors of Carlson et al. (2021).

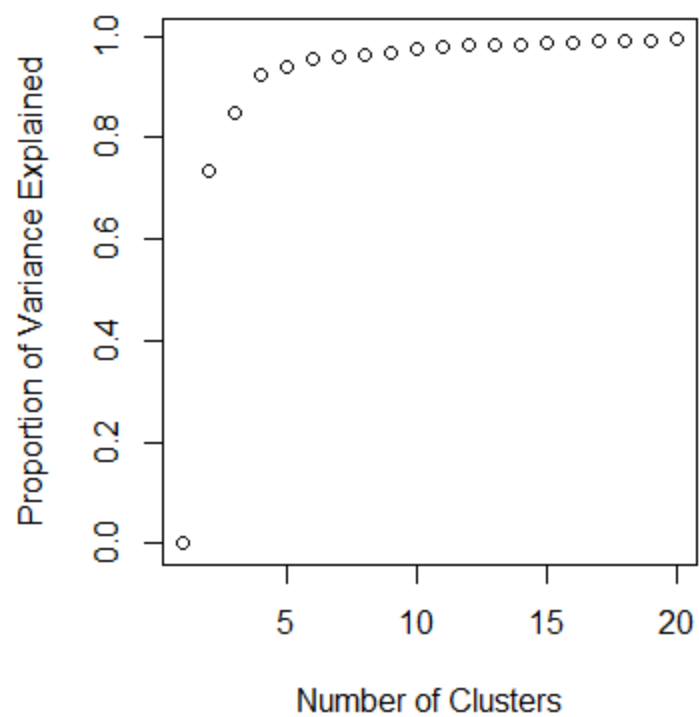

**Supplementary Figure S2.** Elbow plot for  $k$ -means clustering of cultivars by dry biomass proportions.
