# Supplementary material for: Correlations among morphological and biochemical traits in high‐cannabidiol hemp ( Cannabis sativa L.)
Source: PubMed Central journal article supplement — Plant Direct. 2023 Jun 19;7(6):e503. doi: 10.1002/pld3.503 (PMC10280002; doi:10.1002/pld3.503), 2023-06-19
Supplement: PLD3-7-e503-s004.pdf [file PLD3-7-e503-s004.pdf]

**Table S2.** Analysis of variance from stepwise selection as well as relative importance (R %) of predictor variables for change in cannabinoid concentration by section (n=226). A total of 27.71% of the variation in change in cannabinoid concentration by section was explained by predictor variables.

| Predictor           | df  | Sum Sq | Mean Sq | F value | Pr(>F)      | R (%) |
|---------------------|-----|--------|---------|---------|-------------|-------|
| S4strip             | 1   | 5.24   | 5.24    | 19.52   | <0.0001 *** | 8.07  |
| S3strip             | 1   | 11.81  | 11.81   | 43.97   | <0.0001 *** | 6.09  |
| S4PropStripped      | 1   | 1.14   | 1.14    | 4.22    | 0.0411 *    | 2.95  |
| Hratio              | 1   | 1.7    | 1.7     | 6.34    | 0.0125 *    | 2.76  |
| S2PropStripped      | 1   | 0.96   | 0.96    | 3.56    | 0.0606 .    | 1.91  |
| logS4striptoS5strip | 1   | 0.53   | 0.53    | 1.96    | 0.1634      | 1.68  |
| MCDH                | 1   | 0.15   | 0.15    | 0.56    | 0.4549      | 1.47  |
| InitialHeight       | 1   | 0.6    | 0.6     | 2.25    | 0.1351      | 1.39  |
| PropDry             | 1   | 0.21   | 0.21    | 0.79    | 0.0125 *    | 1.39  |
| Residuals           | 217 | 58.28  | 0.26    |         |             |       |

Significance thresholds: <0.001 '\*\*\*', 0.01 '\*\*', 0.05 '\*', 0.1 '.'
